# Supplementary material for: Construction of an S-type Fe-doped g-C 3 N 4 /MoS 2 heterojunction for enhanced charge separation and dual photocatalytic activities
Source: Royal Society of Chemistry journal article supplement (doi:10.1039/d5nj03254g), 2025-01-01
Supplement: d5nj03254g1.pdf [file d5nj03254g1.pdf]

## **Supplementary Data**

### **Construction of an S-Type Fe-Doped g-C<sub>3</sub>N<sub>4</sub>/MoS<sub>2</sub> Heterojunction for Enhanced Charge Separation and Dual Photocatalytic Activities**

Haiyan Qian<sup>1</sup>, Wenbin Qu<sup>2</sup>, Lixin Song<sup>1</sup>, Pingfan Du<sup>1\*</sup>

<sup>1</sup>College of Textile Science and Engineering, Zhejiang Sci-Tech University,  
Hangzhou 310018, PR China

<sup>2</sup>Research Institute of Frontier Science, Southwest Jiaotong University, Chengdu  
610031, China

\*Corresponding author. Tel.: +86 571 86849370; fax: +86 571 86843603.

E-mail address: dupf@zstu.edu.cn (P. Du).

## Materials

Ammonium molybdate tetrahydrate ( $(\text{NH}_4)_6\text{Mo}_7\text{O}_{24}\cdot 4\text{H}_2\text{O}$ ), thiourea ( $\text{CH}_4\text{N}_2\text{S}$ ), melamine ( $\text{C}_3\text{H}_6\text{N}_6$ ), ferric nitrate nonahydrate ( $\text{Fe}(\text{NO}_3)_3\cdot 9\text{H}_2\text{O}$ ), methanol ( $\text{CH}_3\text{OH}$ ), absolute ethanol ( $\text{C}_2\text{H}_5\text{OH}$ ), isopropanol (IPA), benzoquinone (BQ), disodium ethylenediaminetetraacetate (EDTA-2Na), and Nafion perfluorinated resin solution were all purchased from Hangzhou Gaojing Fine Chemical Co., Ltd. Polypropylene (PP) fibers were obtained from Zhejiang Jinda New Material Technology Co., Ltd. All chemicals used in this study were of analytical grade and used without further purification. Deionized water was used as the solvent throughout all experiments.

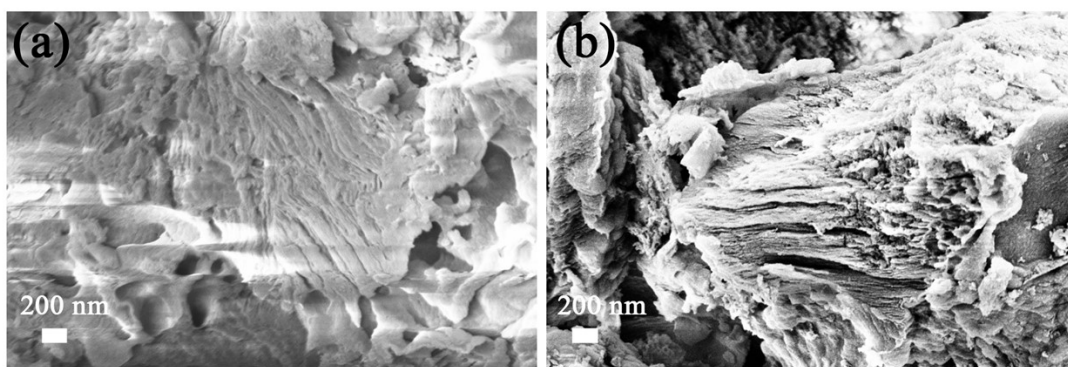

Fig. S1. SEM images of g-C<sub>3</sub>N<sub>4</sub>

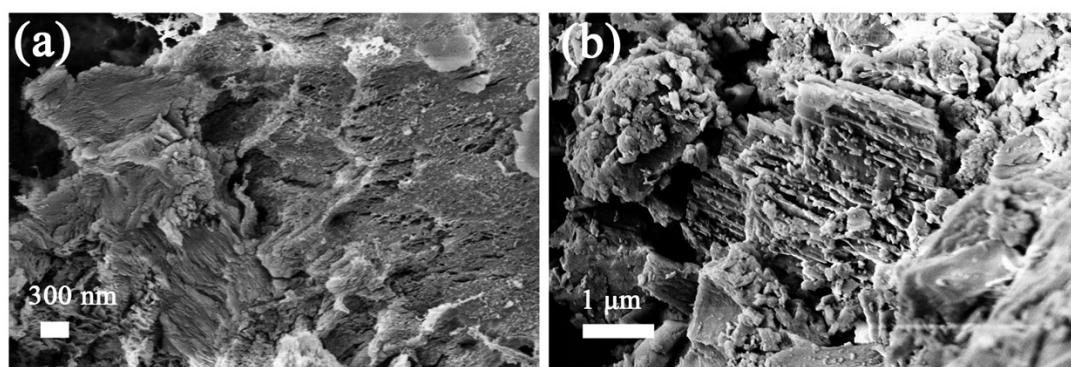

Fig. S2. SEM images of Fe-g-C<sub>3</sub>N<sub>4</sub>

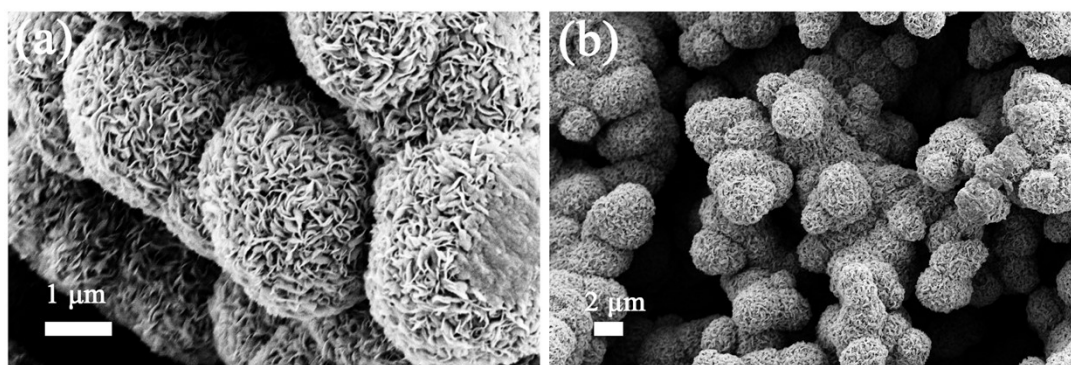

Fig. S3. SEM images of MoS<sub>2</sub>

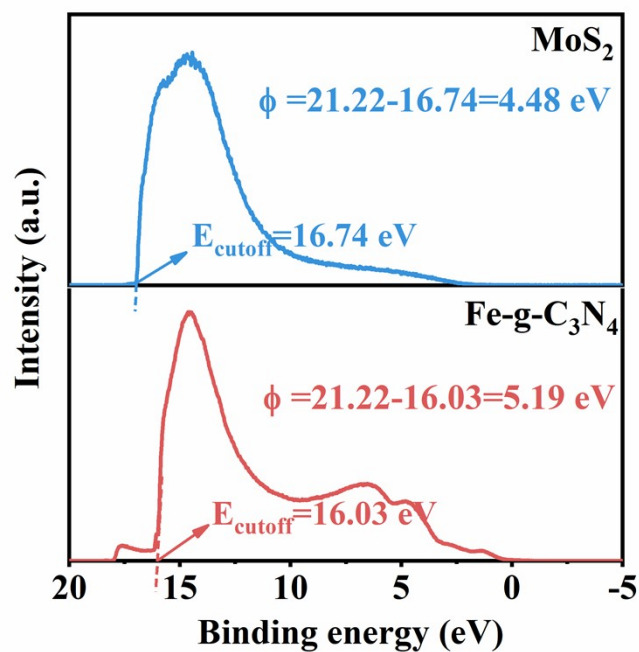

Fig. S4. The UPS of MoS<sub>2</sub> and Fe-g-C<sub>3</sub>N<sub>4</sub>

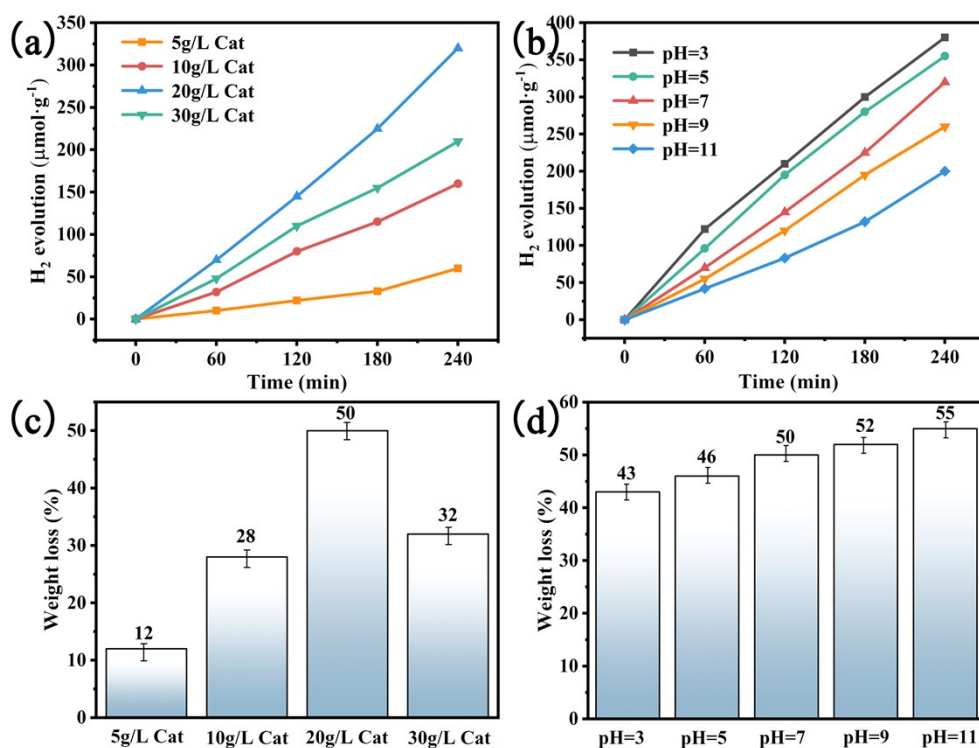

Fig. S5. Effect of catalyst dosage on (a) hydrogen evolution rate and (c) PP degradation rate. The effect of pH on (b) hydrogen evolution rate and (d) PP degradation rate.

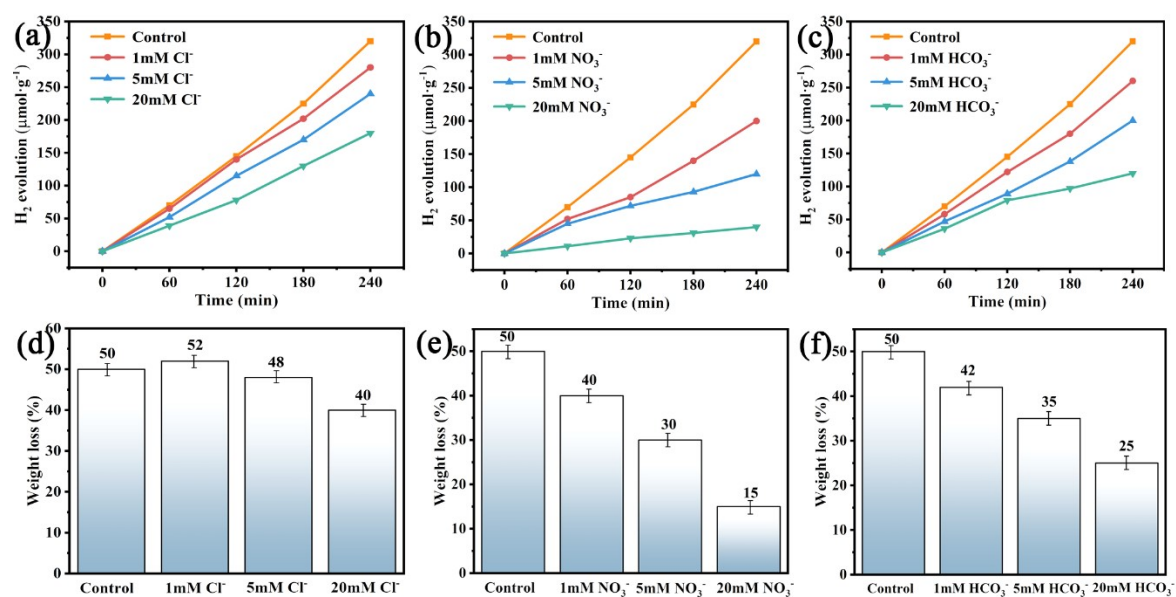

Fig. S6. Effect of Cl<sup>-</sup> on (a) hydrogen evolution rate and (d) PP degradation rate. The effect of NO<sub>3</sub><sup>-</sup> on (b) hydrogen evolution rate and (d) PP degradation rate. The effect of HCO<sub>3</sub><sup>-</sup> on (b) hydrogen evolution rate and (d) PP degradation rate.

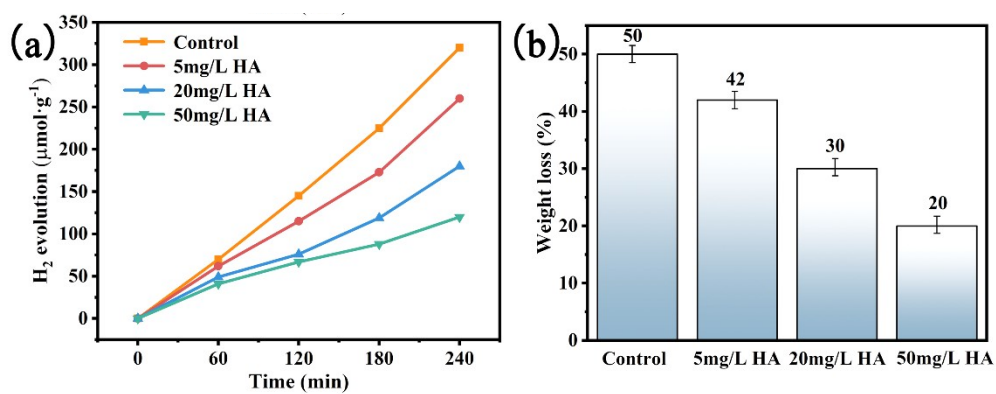

Fig. S7. Effect of HA on (a) hydrogen evolution rate and (d) PP degradation rate.

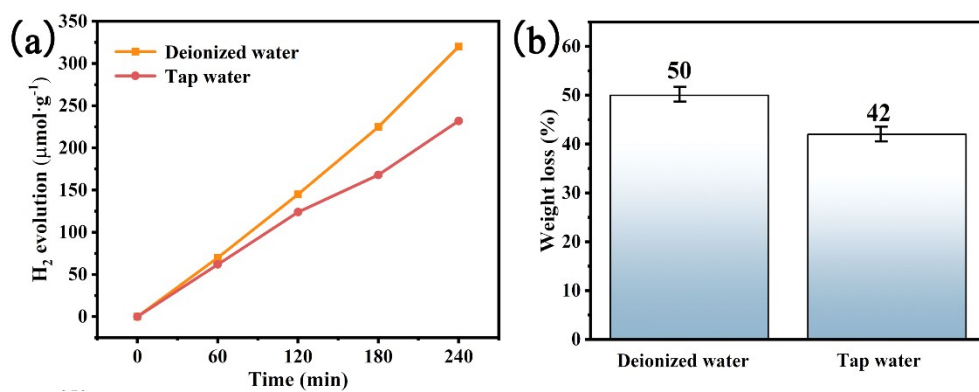

Fig. S8. The hydrogen production (a) and pp degradation amounts (b) in deionized water and tap water.
